# Supplementary material for: Metal–organic frameworks constructed from an [MS4Cux]x−2 (M = W, Mo) unit: isomerization of the cluster unit induced by temperature
Source: Royal Society of Chemistry journal article supplement (doi:10.1039/d1ce00647a), 2021-01-01
Supplement: d1ce00647a1.pdf [file d1ce00647a1.pdf]

## Supplementary Information

### **Metal-organic frameworks constructed from $[\text{MS}_4\text{Cu}_x]^{x-2}$ (M = W, Mo)**

#### **unit: isomerization of the cluster unit induced by temperature**

Mei-Mei Meng,<sup>a</sup> Ji-Ming Xi,<sup>a</sup> Li-Fei Wang,<sup>a</sup> Rui Zhu,<sup>a</sup> Rui Zhang,<sup>\*a</sup> Zhen-Zhong Lu,<sup>\*a,b</sup> He-Gen Zheng,<sup>\*b</sup> Wei Huang<sup>a,c</sup>

- a. Key Laboratory of Flexible Electronics (KLOFE) & Institute of Advanced Materials (IAM), Nanjing Tech University (NanjingTech), 30 South Puzhu Road, Nanjing 211800, China.
- b. State Key Laboratory of Coordination Chemistry, School of Chemistry and Chemical Engineering, Collaborative Innovation Center of Advanced Microstructures, Nanjing University, Nanjing 210023, P. R. China.
- c. Institute of Flexible Electronics (IFE), Northwestern Polytechnical University (NPU), 127 West Youyi Road, Xi'an 710072, China

Table 1. Crystal and Structure Refinement Data for compound **1**, **2** and **3**.

|                                        | <b>1</b>                                                                                         | <b>2</b>                                                                                                          | <b>3</b>                                                                                          |
|----------------------------------------|--------------------------------------------------------------------------------------------------|-------------------------------------------------------------------------------------------------------------------|---------------------------------------------------------------------------------------------------|
| Empirical formula                      | C <sub>72</sub> H <sub>48</sub> Cu <sub>4</sub> I <sub>2</sub> WN <sub>6</sub><br>S <sub>4</sub> | C <sub>132</sub> H <sub>88</sub> Cu <sub>12</sub> I <sub>8</sub> N <sub>11</sub><br>S <sub>8</sub> W <sub>2</sub> | C <sub>72</sub> H <sub>48</sub> Cu <sub>4</sub> I <sub>2</sub> MoN<br><sub>6</sub> S <sub>4</sub> |
| Formula weight                         | 1817.21                                                                                          | 4230.08                                                                                                           | 1729.30                                                                                           |
| Temperature (K)                        | 290                                                                                              | 190                                                                                                               | 290                                                                                               |
| Diffn. wavelength (Å)                  | 0.71073                                                                                          | 1.34138                                                                                                           | 0.71073                                                                                           |
| Crystal system                         | monoclinic                                                                                       | triclinic                                                                                                         | monoclinic                                                                                        |
| Space group                            | <i>C</i> 2/c                                                                                     | <i>P</i> -1                                                                                                       | <i>C</i> 2/c                                                                                      |
| <i>a</i> (Å)                           | 41.445(2)                                                                                        | 20.178(1)                                                                                                         | 41.487(1)                                                                                         |
| <i>b</i> (Å)                           | 7.934(1)                                                                                         | 20.200(1)                                                                                                         | 7.937(1)                                                                                          |
| <i>c</i> (Å)                           | 30.992(1)                                                                                        | 26.662(1)                                                                                                         | 30.998(1)                                                                                         |
| <i>a</i> (°)                           | 90                                                                                               | 109.032(2)                                                                                                        | 90                                                                                                |
| <i>β</i> (°)                           | 129.393(1)                                                                                       | 103.717(2)                                                                                                        | 129.454(1)                                                                                        |
| <i>γ</i> (°)                           | 90                                                                                               | 100.951(2)                                                                                                        | 90                                                                                                |
| <i>V</i> , Å <sup>3</sup>              | 7876.2(8)                                                                                        | 9548.7(8)                                                                                                         | 7882.1(6)                                                                                         |
| <i>Z</i>                               | 4                                                                                                | 2                                                                                                                 | 4                                                                                                 |
| $\rho_{\text{calc}}$ Mg/m <sup>3</sup> | 1.532                                                                                            | 1.471                                                                                                             | 1.457                                                                                             |
| $\mu$ , mm <sup>-1</sup>               | 3.448                                                                                            | 16.262                                                                                                            | 2.146                                                                                             |
| F(000)                                 | 3528                                                                                             | 4010.0                                                                                                            | 3400                                                                                              |
| Refl. collected                        | 28741                                                                                            | 138028                                                                                                            | 29193                                                                                             |
| Independent refl.                      | 6475                                                                                             | 25235                                                                                                             | 6676                                                                                              |
| Final R indices(R <sub>1</sub> )       | 0.0364                                                                                           | 0.0412                                                                                                            | 0.0310                                                                                            |
| (all data) wR <sub>2</sub>             | 0.1221                                                                                           | 0.1210                                                                                                            | 0.1232                                                                                            |
| GOOF                                   | 1.036                                                                                            | 1.066                                                                                                             | 1.051                                                                                             |

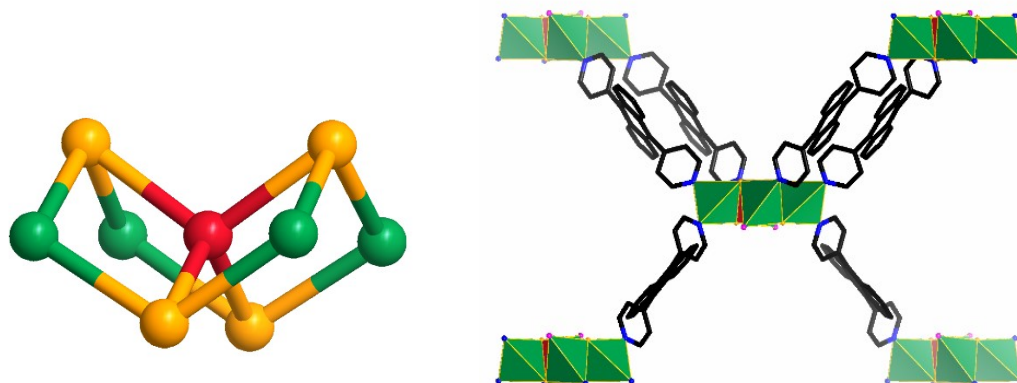

Figure S1. (Left) The penta-nuclear  $[\text{WS}_4\text{Cu}_4]^{2+}$  unit in **1**. (Right) A diagram showing the tetrahedral connectivity of the  $[\text{WS}_4\text{Cu}_4]^{2+}$  unit in **1**. (C, dark grey; N, blue; S, golden; I, pink; W, dark red; Cu, green, H atoms are omitted for clarity)

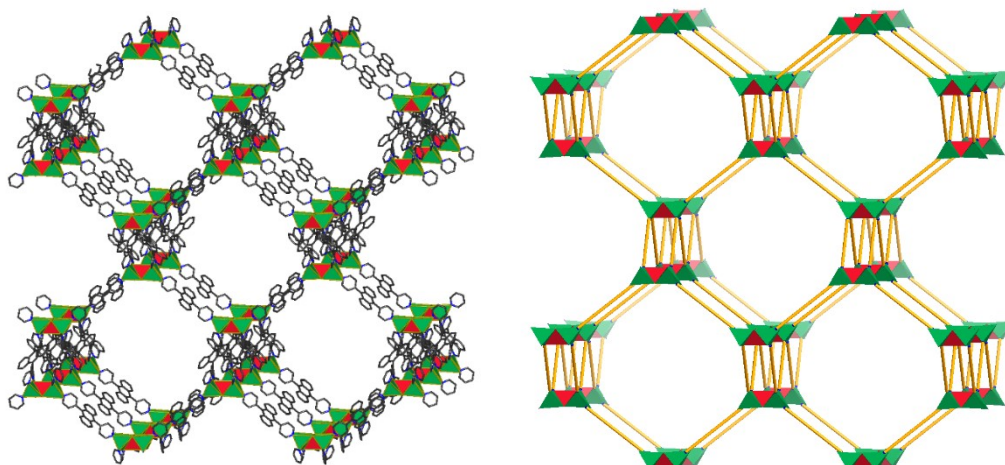

Figure S2. (Left) One of the diamondoid networks in **1**. (Right) A schematic view showing the diamondoid topology in **1**. (C, dark grey; N, blue; S, golden; W, dark red polyhedron; Cu, green polyhedron, H atoms are omitted for clarity)

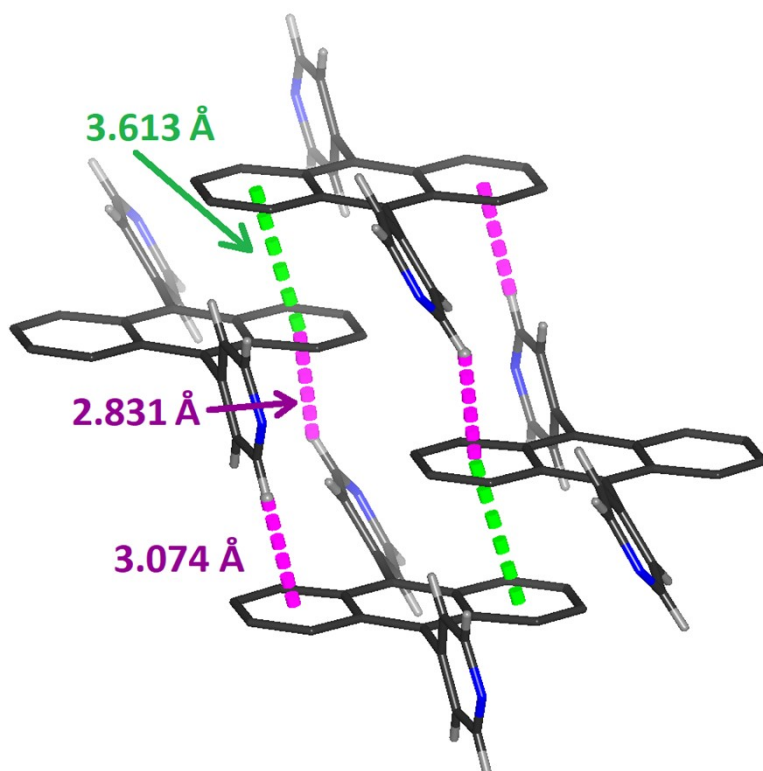

Figure S3. A diagram showing the  $\pi$ - $\pi$  interactions (green dashed lines) and C-H $\cdots$  $\pi$  interactions (pink dashed lines) in **1** (The  $\pi$ - $\pi$  interactions are formed between the anthracene groups of the *dpa* ligands (3.613 Å), the C-H $\cdots$  $\pi$  interactions are formed between the pyridine group and the anthracene groups of the *dpa* ligands from adjacent interpenetrated networks).

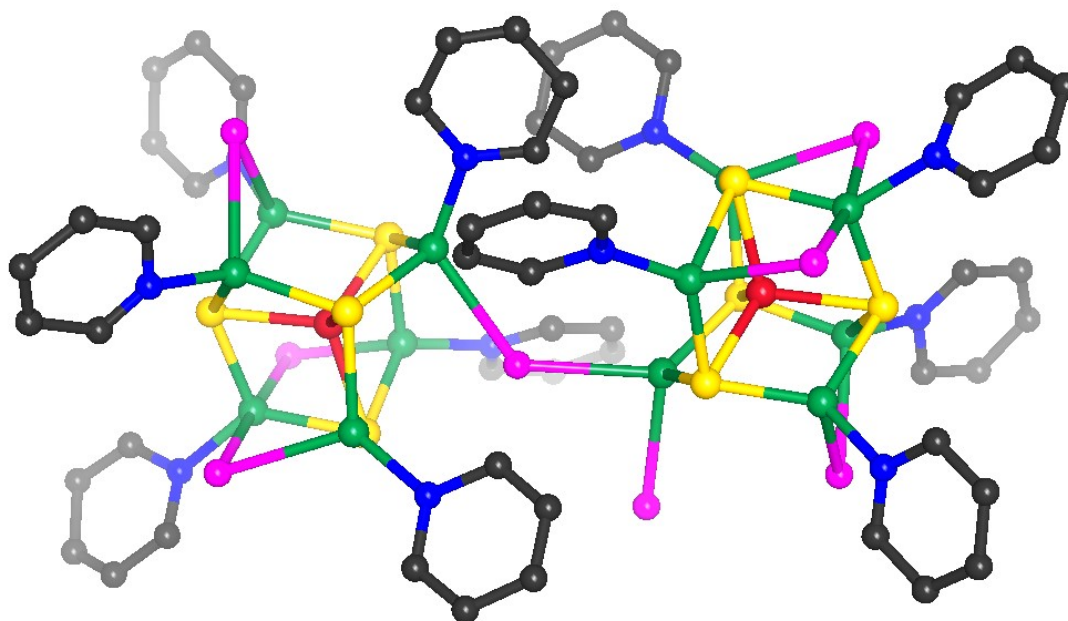

Figure S4. The coordination environment of the  $[\text{WS}_4\text{Cu}_6]^{4+} \cdot \text{I}^- \cdot [\text{WS}_4\text{Cu}_6]^{4+}$  cluster unit in **2** (C, black; N, blue; S, golden; I, pink; W, dark red; Cu, green, H atoms are omitted for clarity).

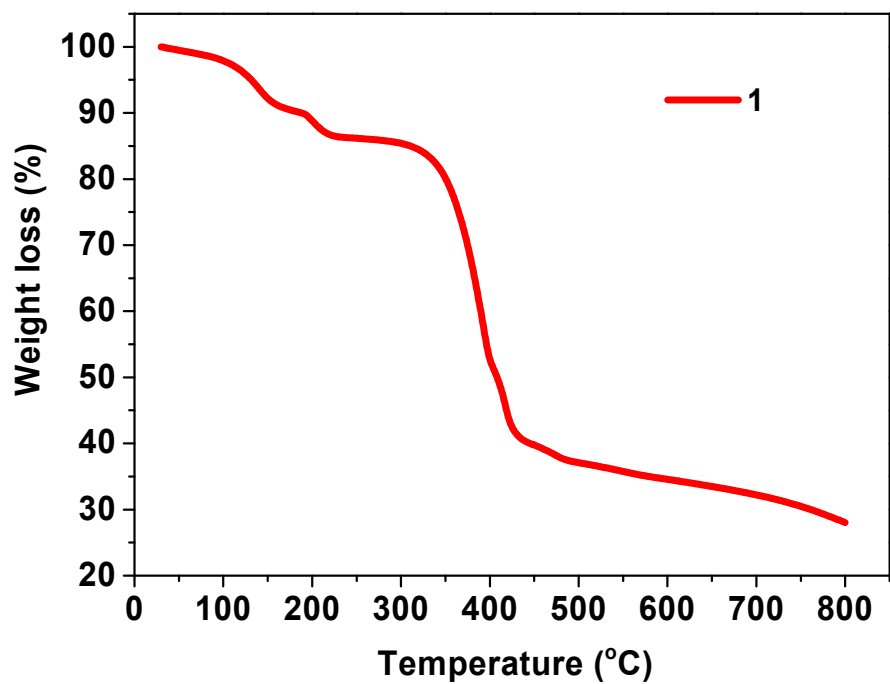

Figure S5 TGA result of 1.

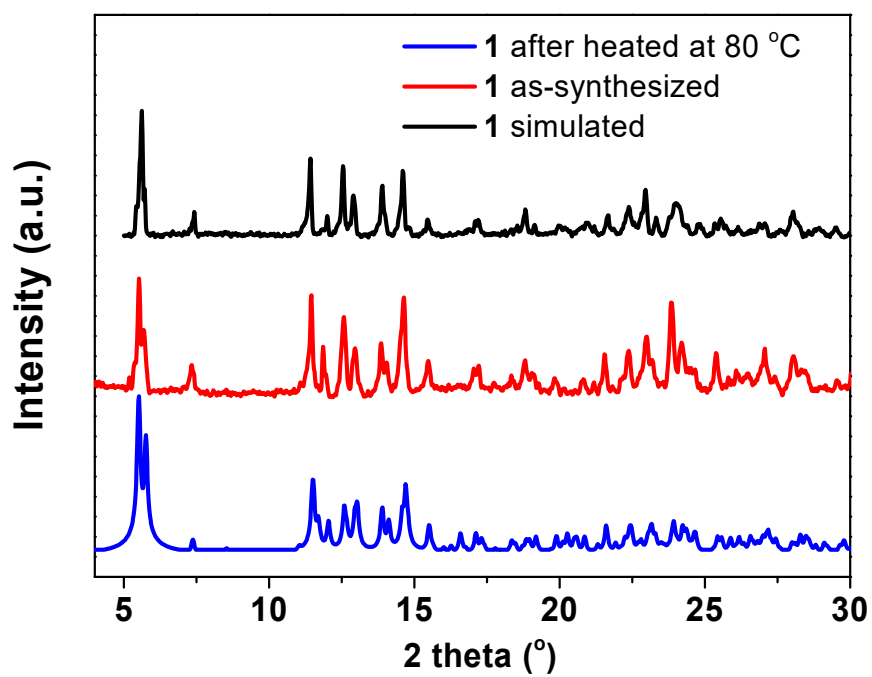

Figure S6. Powder XRD result of 1.

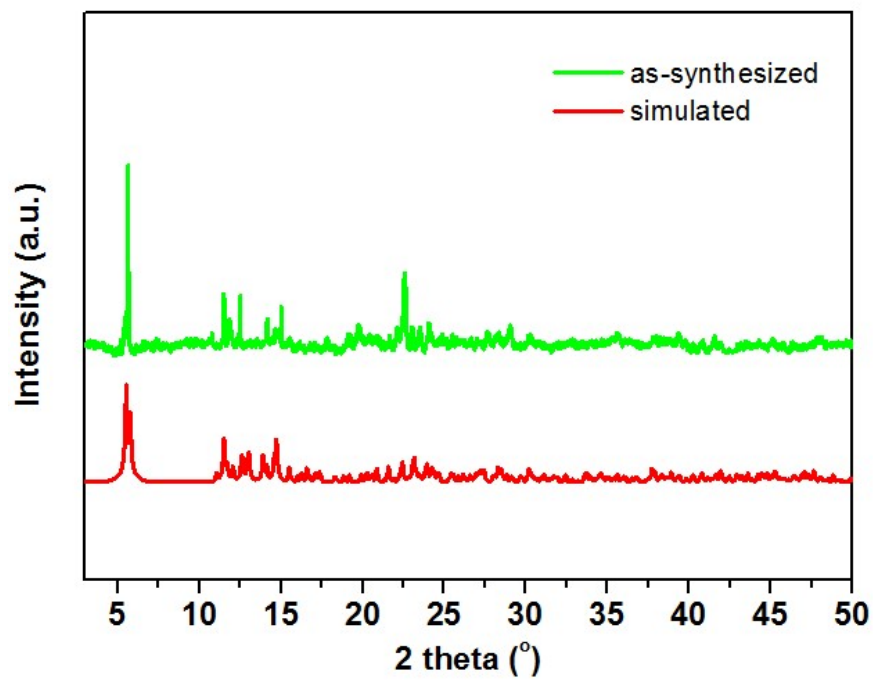

Figure S7. Powder XRD result of 3.
